# Supplementary material for: Systematic evaluation of the gut microbiome of swamp eel ( Monopterus albus ) by 16S rRNA gene sequencing
Source: PeerJ journal article supplement (doi:10.7717/peerj.8176), 2019-12-20

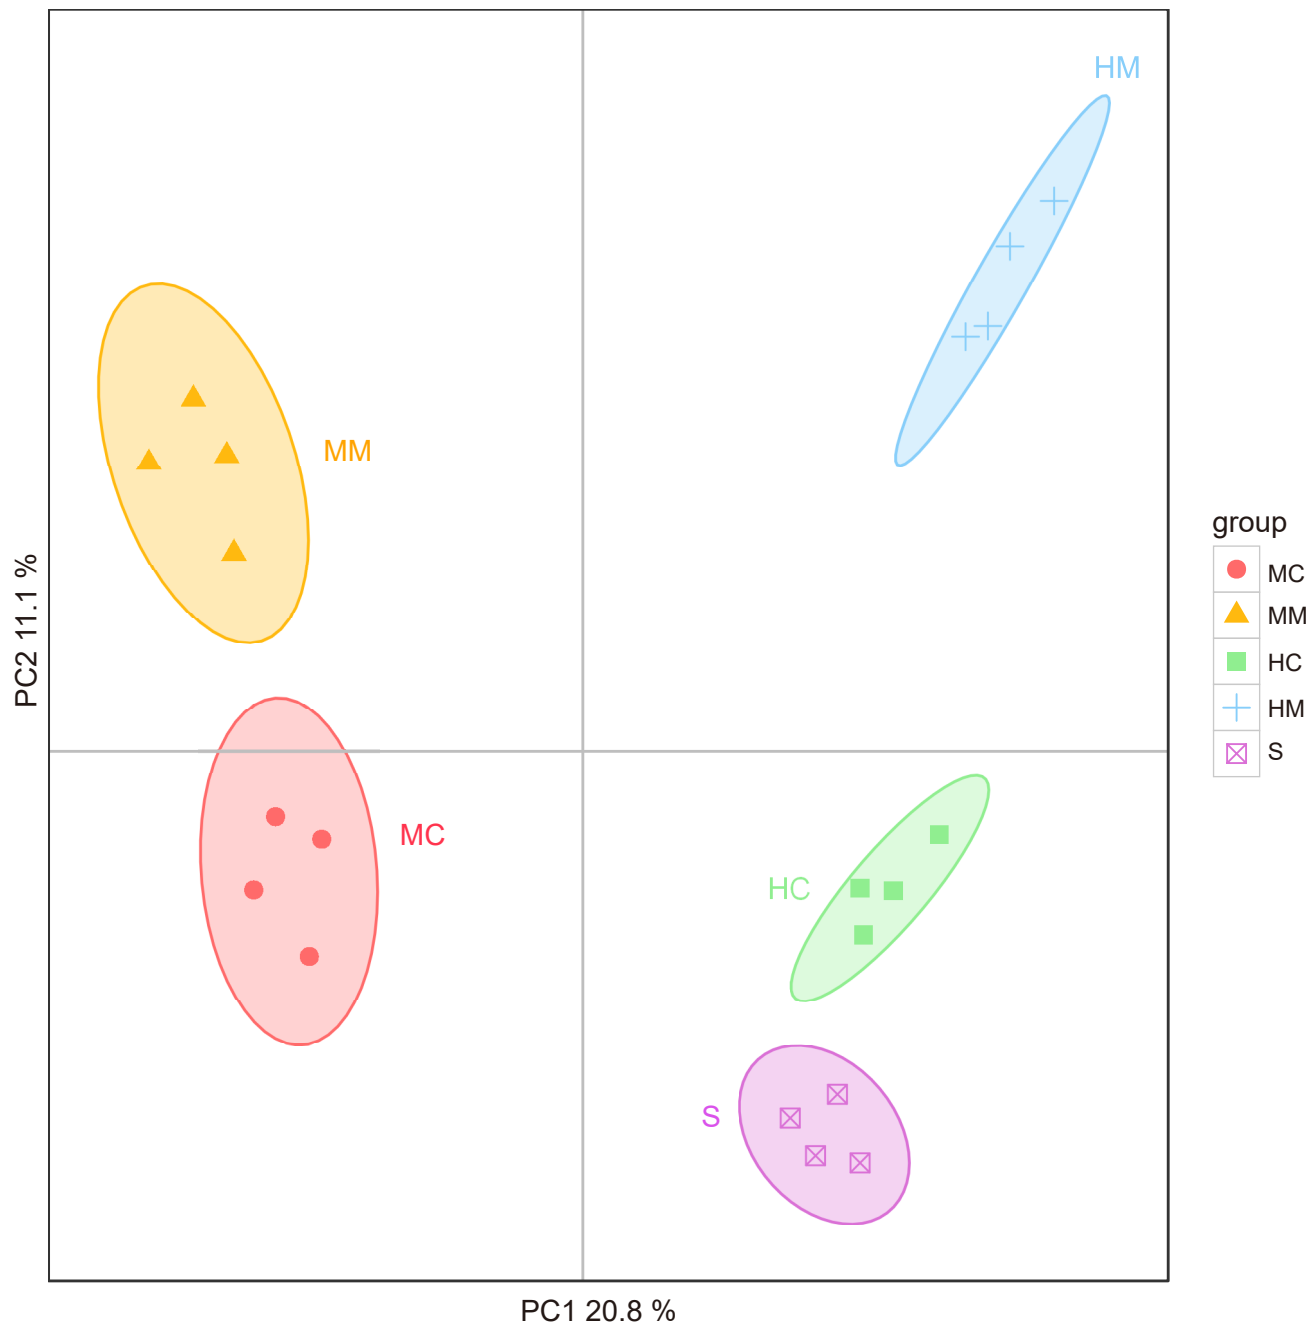

Supplement: Figure_S2.pdf [file Figure_S2.pdf]
